# Supplementary material for: Electronic properties and high-pressure behavior of wolframite-type CoWO4
Source: Royal Society of Chemistry journal article supplement (doi:10.1039/d1ma00510c), 2021-01-01
Supplement: d1ma00510c1.pdf [file d1ma00510c1.pdf]

# Electronic Properties and High-Pressure Behavior of Wolframite-Type $\text{CoWO}_4$

*Enrico Bandiello*<sup>1,\*</sup>, *Plácida Rodríguez-Hernández*<sup>2</sup>, *Alfonso Muñoz*<sup>2</sup>, *Manuel Bajo Buenestado*<sup>1</sup>, *Catalin Popescu*<sup>3</sup>, *Daniel Errandonea*<sup>1</sup>

<sup>1</sup>Departamento de Física Aplicada-ICMUV, MALTA Consolider Team, Universidad de Valencia, Edificio de Investigación, C/Dr. Moliner 50, Burjassot, 46100 Valencia, Spain

<sup>2</sup>Departamento de Física, Instituto de Materiales y Nanotecnología, MALTA Consolider Team, Universidad de La Laguna, Tenerife E38205, Spain

<sup>3</sup>CELLS-ALBA Synchrotron Light Facility, Cerdanyola del Valles, 08290 Barcelona, Spain

\*Corresponding author: Enrico Bandiello; email: [enrico.bandiello@uv.es](mailto:enrico.bandiello@uv.es)

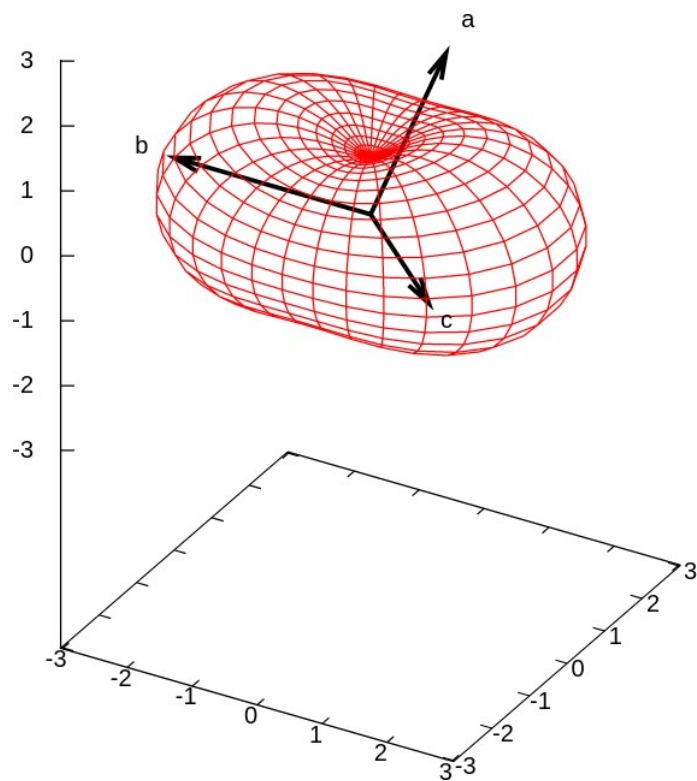

**Figure S1.** Compressibility indicatrix of  $\text{CoWO}_4$ . Red regions indicate positive linear compressibility.

|                       | Experiment | Calculations | Literature <sup>a</sup> |
|-----------------------|------------|--------------|-------------------------|
| $a$ (Å)               | 4.670(5)   | 4.61176      | 4.6698(9)               |
| $b$ (Å)               | 5.687(6)   | 5.67847      | 5.6873(23)              |
| $c$ (Å)               | 4.951(5)   | 4.93178      | 4.9515(17)              |
| $\beta$ (deg)         | 90.08(9)   | 90.3215      | 90.00                   |
| $V$ (Å <sup>3</sup> ) | 131.5(2)   | 129.15       | 131.50                  |

**Table S1.** Unit-cell parameters  $a$ ,  $b$  and  $c$  and cell volume  $V$  for  $\text{CoWO}_4$  at ambient pressure, as obtained from our experiments and calculations *ab initio* simulations, and comparison with Literature.

<sup>a</sup>H. Weitzel, *Zeitschrift für Krist. - New Cryst. Struct.*, 1976, **144**, 238–258.

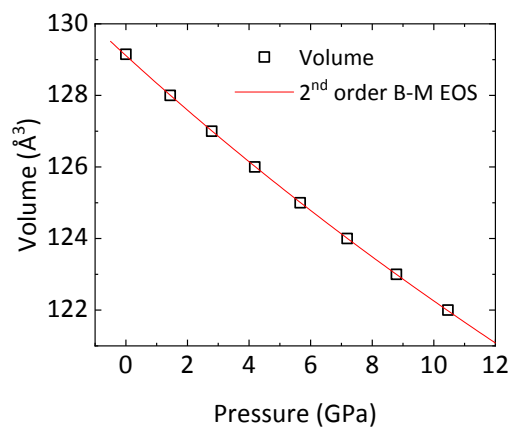

**Figure S2.** Pressure-Volume data for CoWO<sub>4</sub> (squares) as obtained from *ab initio* simulations. In red, the fitting of the data to a 2<sup>nd</sup> order Birch-Murnaghan EOS.

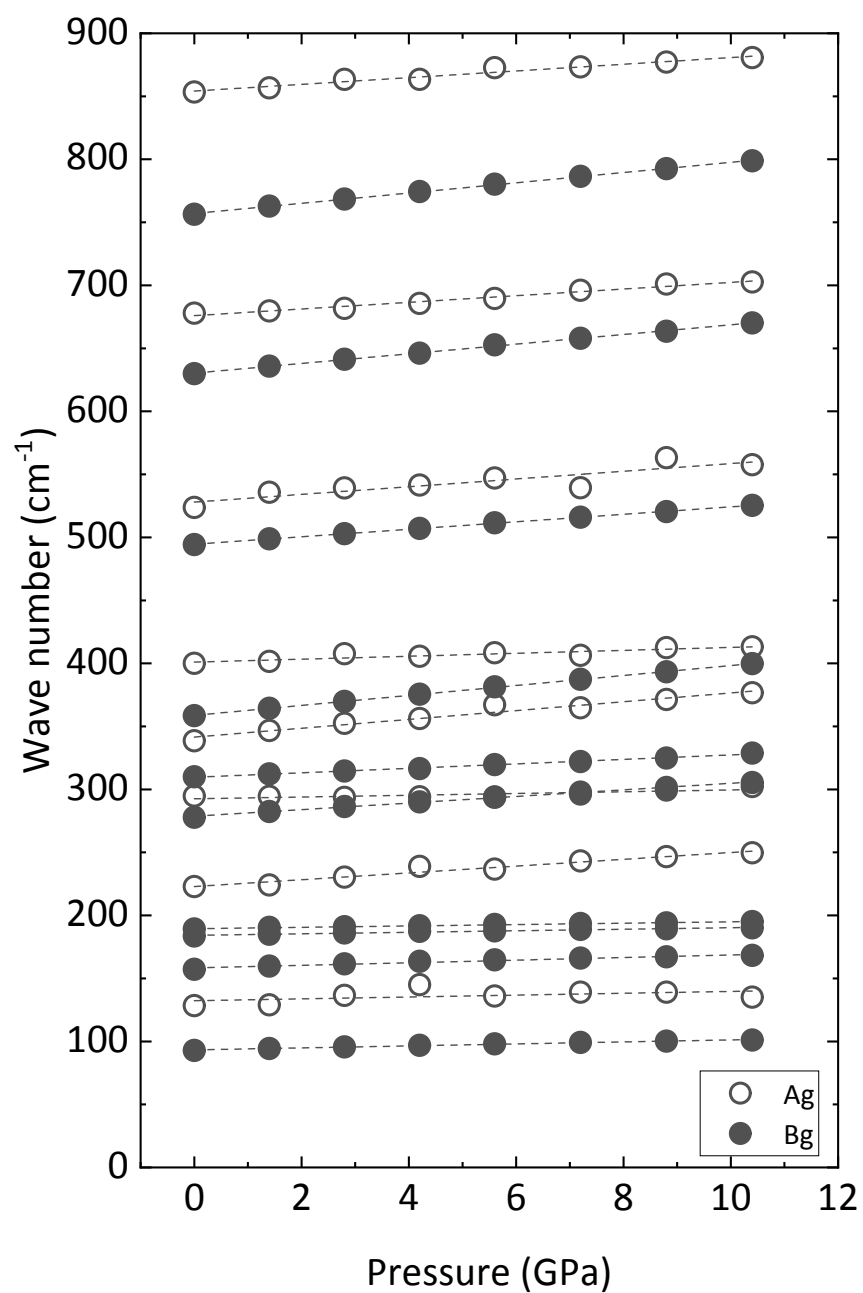

**Figure S3.** Frequency of Raman modes vs. pressure for wolframite-type  $\text{CoWO}_4$  (circles), as calculated by ab initio simulations. Dashed lines are the linear fits used for the calculation of the pressure coefficients and Grüneisen parameters reported in the main manuscript.

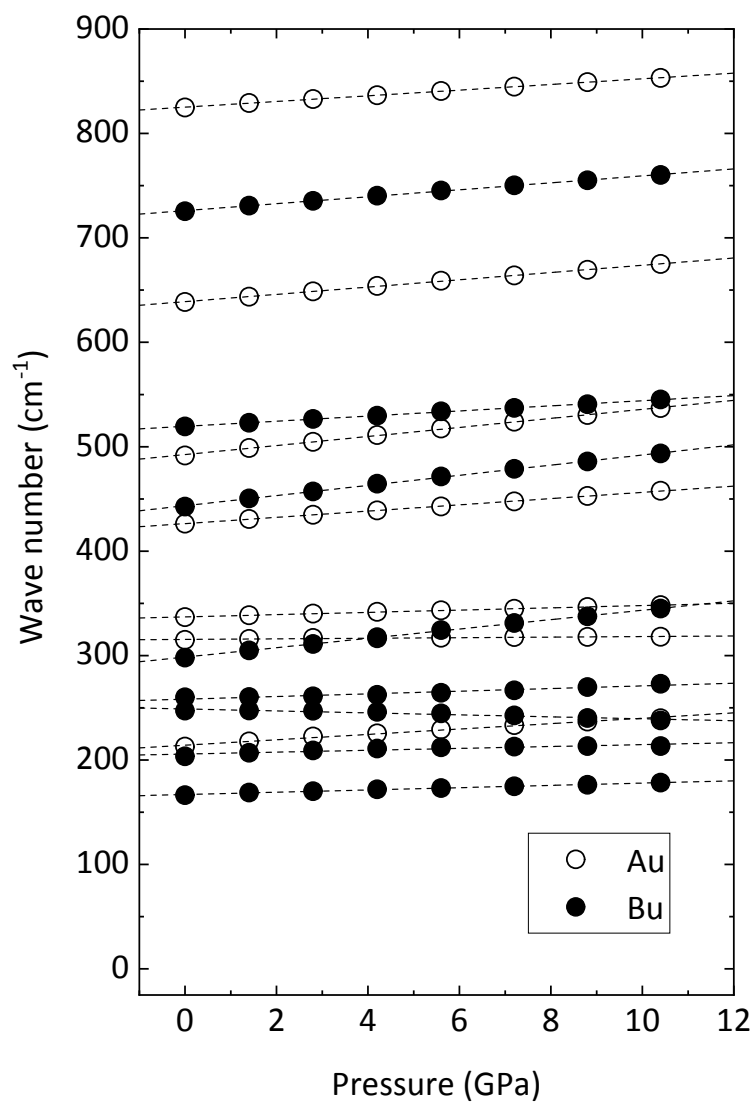

**Figure S4.** Evolution of IR modes vs. pressure for wolframite-type  $\text{CoWO}_4$  (circles), as calculated by ab initio simulations. Dashed lines are the linear fits used for the calculation of the pressure coefficients.

| Mode           | $\omega_0^c$<br>(cm <sup>-1</sup> ) | Linear fit                        |                                                                      |
|----------------|-------------------------------------|-----------------------------------|----------------------------------------------------------------------|
|                |                                     | $\omega_0$<br>(cm <sup>-1</sup> ) | $\partial\omega/\partial P$<br>(cm <sup>-1</sup> GPa <sup>-1</sup> ) |
| B <sub>u</sub> | 166.38                              | 167.0(2)                          | 1.09(4)                                                              |
| B <sub>u</sub> | 203.54                              | 206(1)                            | 0.90(15)                                                             |
| A <sub>u</sub> | 212.75                              | 214.2(6)                          | 2.6(1)                                                               |
| B <sub>u</sub> | 247.20                              | 249.0(7)                          | -0.94(12)                                                            |
| B <sub>u</sub> | 260.08                              | 258.3(8)                          | 1.27(13)                                                             |
| B <sub>u</sub> | 298.07                              | 298.6(3)                          | 4.48(5)                                                              |
| A <sub>u</sub> | 314.98                              | 315.5(2)                          | 0.27(4)                                                              |
| A <sub>u</sub> | 336.77                              | 337.05(12)                        | 1.09(2)                                                              |
| A <sub>u</sub> | 426.39                              | 426.40(15)                        | 2.99(3)                                                              |
| B <sub>u</sub> | 442.64                              | 443.5(4)                          | 4.86(7)                                                              |
| A <sub>u</sub> | 491.64                              | 492.5(3)                          | 4.33(6)                                                              |
| B <sub>u</sub> | 519.43                              | 519.6(2)                          | 2.45(4)                                                              |
| A <sub>u</sub> | 638.58                              | 639.0(2)                          | 3.48(3)                                                              |
| B <sub>u</sub> | 725.47                              | 726.1(3)                          | 3.33(5)                                                              |
| A <sub>u</sub> | 824.84                              | 825.18(13)                        | 2.71(2)                                                              |

**Table S2.** Ab-initio calculated IR modes for CoWO<sub>4</sub>,  $\omega_0^c$ , and parameters of the linear fits of their evolution with pressure,  $\omega_0$  and  $\partial\omega/\partial P$  (intercept and pressure coefficient, respectively). The symmetry of each phonon is also shown.

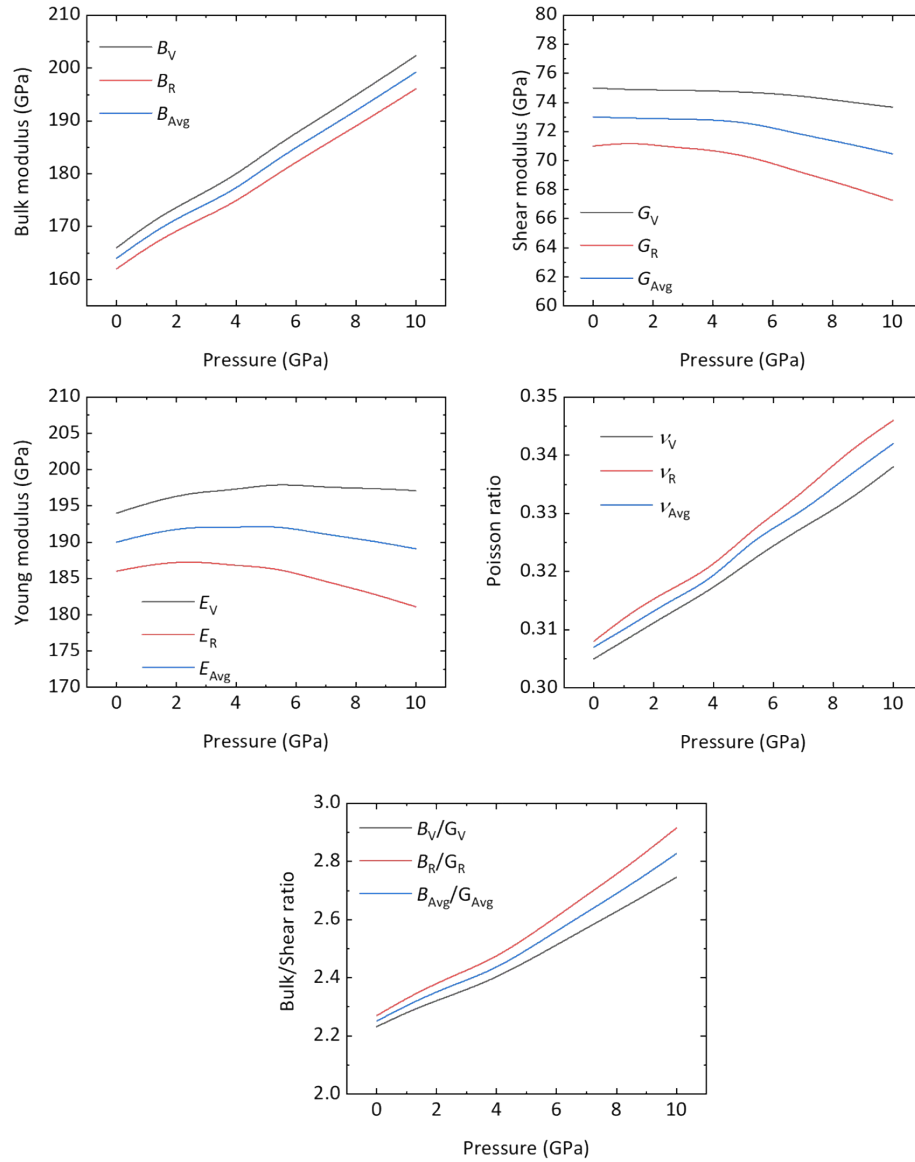

**Figure S5:** Elastic moduli of wolframite-type  $\text{CoWO}_4$  as a function of pressure; a) Bulk modulus, b) Shear modulus, c) Young modulus, d) Poisson ratio, and e) bulk/shear ratio. “V”, “R” and “Avg” subscripts indicate Voigt and Reuss approximation and their average, respectively.
